# Supplementary material for: Computational Biology Dynamics of Mps1 Kinase Molecular Interactions with Isoflavones Reveals a Chemical Scaffold with Potential to Develop New Therapeutics for the Treatment of Cancer
Source: MDPI journal article supplement (doi:10.3390/ijms232214228), 2022-11-17

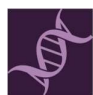

## Support Information

# The dynamics of Mps1 kinase molecular interactions with iso-flavones revealed a chemical scaffold with potential to develop new therapeutics for the treatment of cancer

Lauren Pugh<sup>1</sup>, Alisha Pancholi<sup>1</sup>, Priscila Celeste Purat<sup>1</sup>, Sandra Agudo-Alvarez<sup>2</sup>, Raúl Benito-Arenas<sup>2</sup>, Agatha Bastida<sup>2\*</sup>, Victor M. Bolanos-Garcia<sup>1\*</sup>

**Figure S1.** 2D structure of Reversine (A), Fisetin (B), Genistein (C), Daidzein (D) and Glycitein (E) bound to Mps1 (PDB ID 5ljy).

A

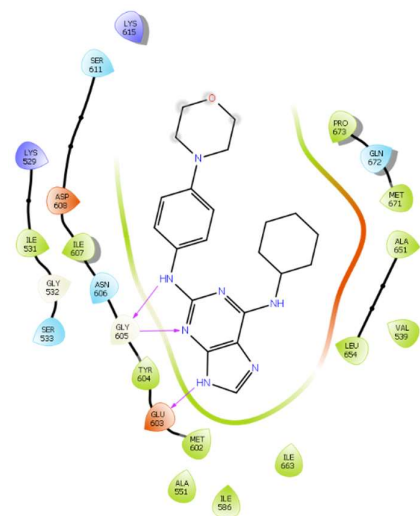

B

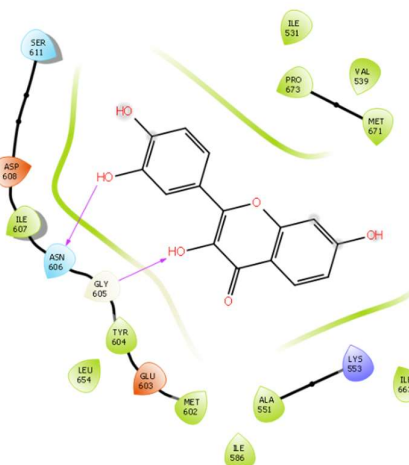

C

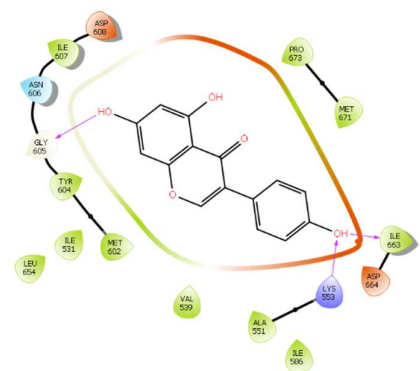

D

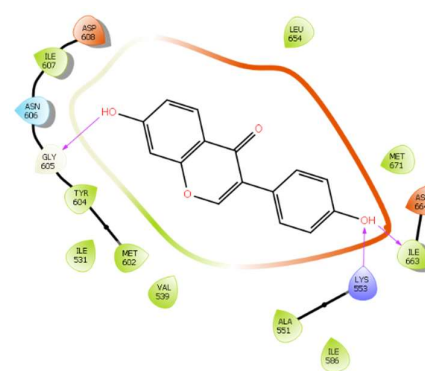

E

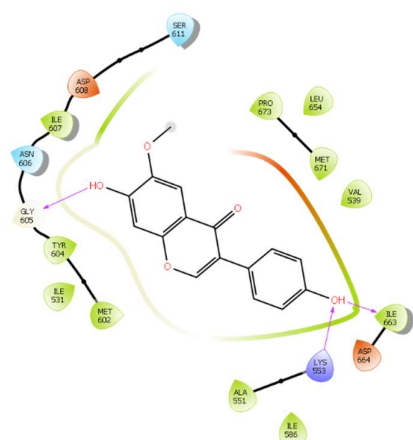

**Figure S2.-** (A) 2D-structure of the nucleotide binding pocket (ATP) of the Mps1; (B) 3-D representation of the Mps1-ATP complex (PDB ID 3hmn).

A

B

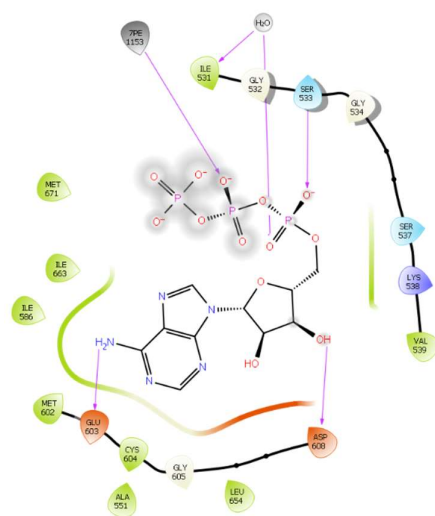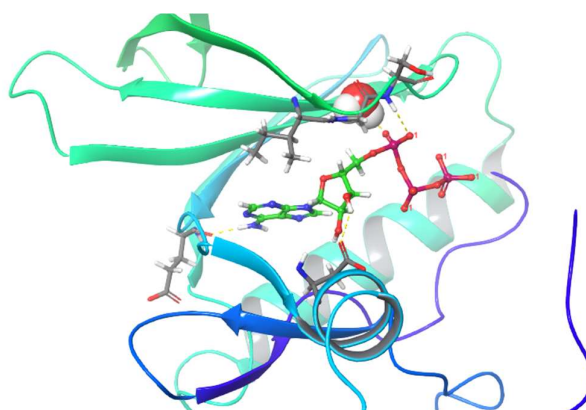

**Figure S3.** 2D structures of new isoflavoids bound to human Mps1 kinase domain. (A) CID 68916574; (B) CID 5378180; (C) CID 11810419; (D) CID 24039298.

A

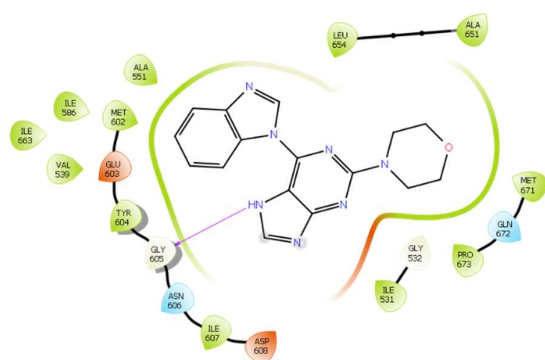

B

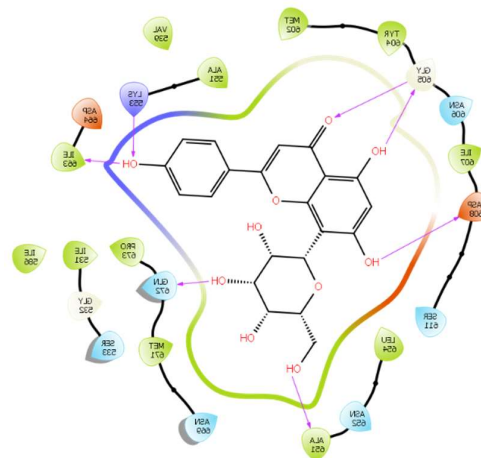

C

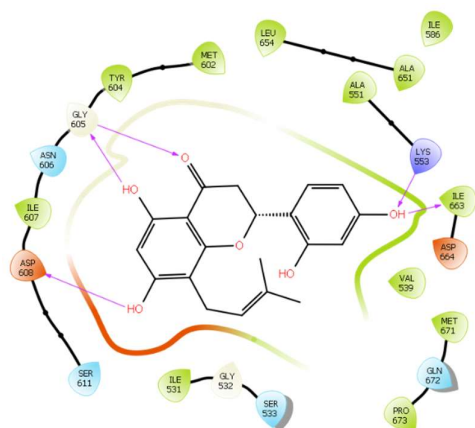

D

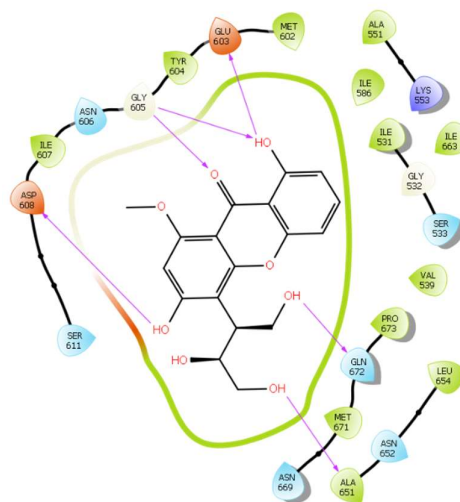

Supplement: s1 [file s1]
